# Supplementary material for: GC-MS Metabolomics Reveals Distinct Profiles of Low- and High-Grade Bladder Cancer Cultured Cells
Source: PubMed Central journal article supplement (PMC6359170; doi:10.3390/metabo9010018), 2019-01-18
Supplement: metabolites-09-00018-s001.pdf [file metabolites-09-00018-s001.pdf]

## Supplementary Information

### **GC-MS metabolomics reveals distinct profiles of low- and high-grade bladder cancer cultured cells**

Daniela Rodrigues<sup>1,\*</sup>, Joana Pinto<sup>1</sup>, Ana Margarida Araújo<sup>1</sup>, Carmen Jerónimo<sup>2,3</sup>, Rui Henrique<sup>2,3,4</sup>, Maria de Lourdes Bastos<sup>1</sup>, Paula Guedes de Pinho<sup>1</sup>, Márcia Carvalho<sup>1,5,\*</sup>

<sup>1</sup>UCIBIO/REQUIMTE, Department of Biological Sciences, Laboratory of Toxicology, Faculty of Pharmacy, University of Porto, Porto, Portugal

<sup>2</sup>Cancer Biology & Epigenetics Group, Research Center (CI-IPOP) Portuguese Oncology Institute of Porto (IPO Porto), Porto, Portugal.

<sup>3</sup>Department of Pathology and Molecular Immunology-Biomedical Sciences Institute (ICBAS), University of Porto, Porto, Portugal.

<sup>4</sup>Department of Pathology, Portuguese Oncology Institute of Porto (IPO Porto), Porto, Portugal.

<sup>5</sup>UFP Energy, Environment and Health Research Unit (FP-ENAS), University Fernando Pessoa, Porto, Portugal

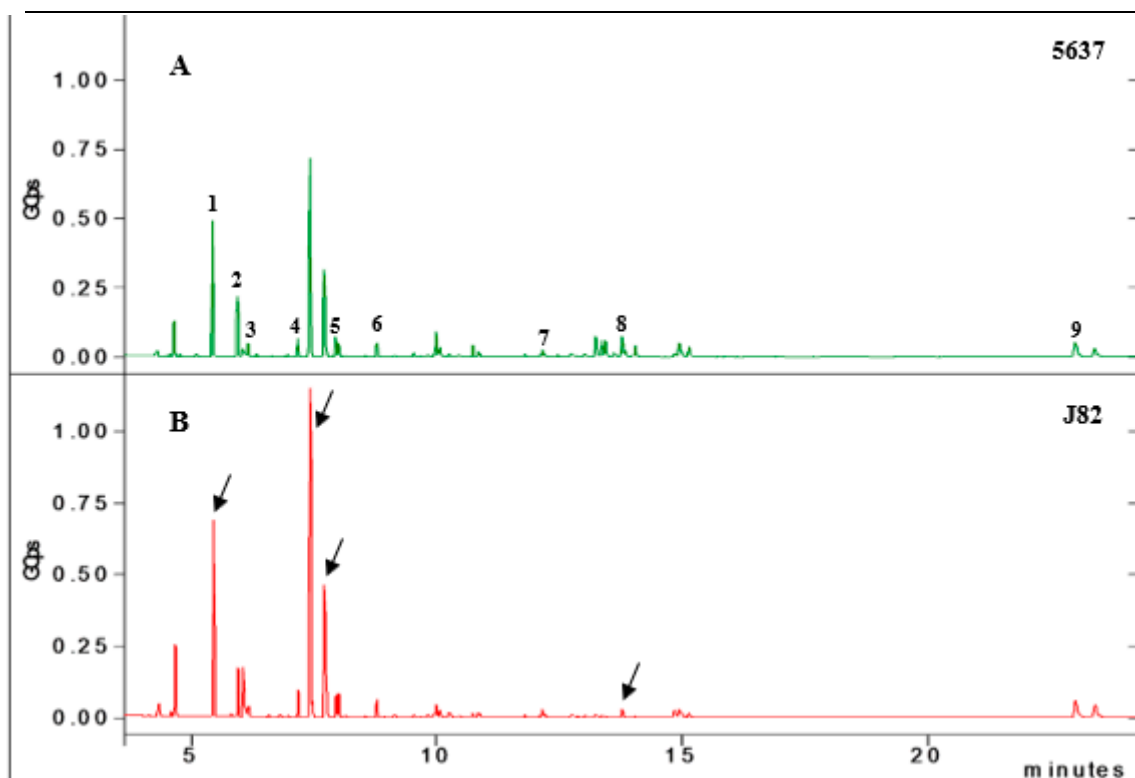

**Supplementary Figure S1.** Representative full scan of GC-MS chromatograms obtained from the endometabolome analysis of (A) 5637 and (B) J82 cell lines. Legend: 1 – Lactic acid (2TMS); 2 – L-alanine (2TMS); 3 – Glycine (2TMS); 4 – L-valine (2TMS); 5 – L-isoleucine (2TMS); 6 – L-threonine (3TMS); 7 – Myristic acid (TMS); 8 – Palmitic acid (TMS); 9 – Cholesterol (TMS). TMS, Trimethylsilyl (derivative). The arrows indicate the peaks whose differences are higher between the two BC cell lines.

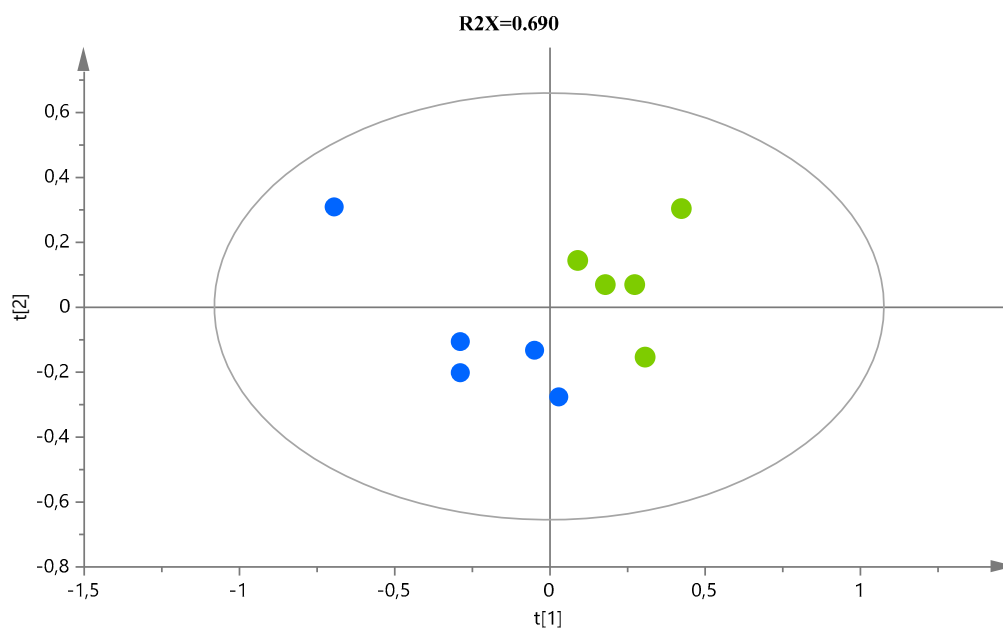

**Supplementary Figure S2.** PCA scores scatter plot obtained for the GC-MS chromatograms obtained from the endometabolome analysis of the cancer cell lines 5637 (n=5, low-grade, TCC, ●) and J82 (n=5, high-grade, TCC, ●). The ellipses indicate the 95% confidence limit of the model.

**Supplementary Table S1.** List of all metabolites identified in the endometabolomes of the cancer cell lines 5637 (LG) and J82 (HG). The identification of the metabolites is based on the NIST (2014) and standards. RT, characteristic ions (*m/z*), identification method with reverse % of match from NIST/standards when used, CAS registry number and HMDB code (when available) are indicated for each compound, as well as the main pathways in which they are involved and BC studies where they were previously found (when reported).

| Metabolite                         | RT        | Characteristic ions ( <i>m/z</i> ) | ID (R.Match/Std) | CAS       | HMDB code | Pathways                                                               | BC studies                                                                                  |
|------------------------------------|-----------|------------------------------------|------------------|-----------|-----------|------------------------------------------------------------------------|---------------------------------------------------------------------------------------------|
| <i>Amino acids and derivatives</i> |           |                                    |                  |           |           |                                                                        |                                                                                             |
| <b>β-Alanine (2TMS)</b>            | 6.91      | 102                                | 874              | 107-95-9  | HMDB00056 | Amino acid metabolism; Pyrimidine metabolism                           | NF                                                                                          |
| <b>Glycine (TMS/2TMS)</b>          | 4.12/6.17 | 75+132/75+102                      | 945/932/Std      | 56-40-6   | HMDB00123 | Amino acid, Purine and Glutathione metabolisms; Bile acid biosynthesis | <i>In vitro</i> : ↑ (1); ↓ (2)<br><i>Ex vivo</i> tissues: ↑ (3)<br><i>Biofluids</i> : ↓ (4) |
| <b>α-Aminobutyric acid (2TMS)</b>  | 6.71      | 130                                | 876              | 1492-24-6 | HMDB00452 | Amino acid metabolism                                                  | <i>Ex vivo</i> tissues: ↑ (5)                                                               |
| <b>L-5-Oxoproline (2TMS)</b>       | 10.00     | 156                                | 940/Std          | 98-79-3   | HMDB00267 | Glutathione metabolism                                                 | NF                                                                                          |
| <b>L-Alanine (TMS/2TMS)</b>        | 4.11/5.95 | 75+103/116+117                     | 905/959/Std      | 56-41-7   | HMDB00161 | Amino acid metabolism; Urea cycle                                      | <i>In vitro</i> : ↑ (2, 6)<br><i>Ex vivo</i> tissues: ↑ (3);<br>↓ (5)                       |
| <b>L-Aspartic acid (2TMS/3TMS)</b> | 9.15/9.55 | 75+160<br>232                      | 711/801/Std      | 56-84-8   | HMDB00191 | Amino acid and Purine metabolisms; Urea cycle                          | <i>In vitro</i> : ↑ (2)<br><i>Ex vivo</i> tissues: ↑ (3)                                    |
| <b>L-Glutamic acid (3TMS)</b>      | 10.75     | 128+246                            | 918/Std          | 56-86-0   | HMDB00148 | Amino acid metabolism                                                  | <i>Ex vivo</i> tissues: ↑ (3)<br><i>Biofluids</i> : ↑ (7)                                   |
| <b>L-Isoleucine (2TMS)</b>         | 7.95      | 158+218                            | 938/Std          | 73-32-5   | HMDB00172 | Amino acid metabolism                                                  | <i>In vitro</i> : ↑ (2)<br><i>Ex vivo</i> tissues: ↑ (3, 5)<br><i>Biofluids</i> : ↓ (4)     |
| <b>L-Leucine (TMS)</b>             | 6.56      | 86                                 | 890/Std          | 61-90-5   | HMDB00687 | Amino acid metabolism                                                  | <i>Ex vivo</i> tissues: ↑ (3, 5)                                                            |

|                                    |             |                    |             |           |           |                                                                      |                                                                                                       |
|------------------------------------|-------------|--------------------|-------------|-----------|-----------|----------------------------------------------------------------------|-------------------------------------------------------------------------------------------------------|
|                                    |             |                    |             |           |           |                                                                      | <i>Biofluids</i> : ↓ (4); ↑ (8)                                                                       |
| <b>L-Methionine (TMS)</b>          | 9.10        | 56+104             | 832/Std     | 63-68-3   | HMDB00696 | Amino acid metabolism                                                | NF                                                                                                    |
| <b>L-Phenylalanine (TMS/2TMS)</b>  | 10.27/10.86 | 120+146<br>192+218 | 889/923/Std | 63-91-2   | HMDB00159 | Amino acid metabolism                                                | <i>In vitro</i> : ↑ (2)<br><i>Ex vivo</i> tissues: ↑ (3, 5)<br><i>Biofluids</i> : ↓ (4, 9, 10); ↑ (8) |
| <b>L-Proline (TMS/2TMS)</b>        | 6.79/8.01   | 70+103<br>142+143  | 853/929/Std | 147-85-3  | HMDB00162 | Amino acid metabolism                                                | <i>In vitro</i> : ↑ (2)                                                                               |
| <b>L-Serine (2TMS/3TMS)</b>        | 7.60/8.56   | 116<br>204+218     | 873/933/Std | 56-45-1   | HMDB00187 | Amino acid metabolism                                                | <i>Ex vivo</i> tissues: ↑ (5)                                                                         |
| <b>L-Threonine (3TMS)</b>          | 8.79        | 117+218            | 957/Std     | 72-19-5   | HMDB00167 | Amino acid metabolism                                                | <i>In vitro</i> : ↑ (2)                                                                               |
| <b>L-Valine (2TMS)</b>             | 7.17        | 144+218            | 931/Std     | 72-18-4   | HMDB00883 | Amino acid metabolism                                                | <i>In vitro</i> : ↑ (2)<br><i>Ex vivo</i> tissues: ↑ (3, 5)<br><i>Biofluids</i> : ↑ (7, 11)           |
| <b><i>Amino alcohol</i></b>        |             |                    |             |           |           |                                                                      |                                                                                                       |
| <b>Ethanolamine (2TMS)</b>         | 5.10        | 102                | 885         | 141-43-5  | HMDB00149 | Phospholipid biosynthesis                                            | NF                                                                                                    |
| <b><i>Fatty Acids</i></b>          |             |                    |             |           |           |                                                                      |                                                                                                       |
| <b>10-Heptadecenoic acid (TMS)</b> | 14.27       | 75+117             | 814         | NA        | HMDB60038 | NA                                                                   | NF                                                                                                    |
| <b>11-Eicosenoic acid (TMS)</b>    | 16.81       | 75+117+129         | 814         | 2462-94-4 | HMDB34296 | NA                                                                   | NF                                                                                                    |
| <b>Arachidonic acid (TMS)</b>      | 16.31       | 75+79              | 846         | 506-32-1  | HMDB01043 | Arachidonic acid metabolism; Biosynthesis of unsaturated fatty acids | NF                                                                                                    |
| <b>Heptadecanoic acid (TMS)</b>    | 14.42       | 116+327            | 871         | 506-12-7  | HMDB02259 | NA                                                                   | <i>Biofluids</i> : ↑ (12)                                                                             |

|                                      |       |                        |         |           |           |                                                                                         |                                                                                                           |
|--------------------------------------|-------|------------------------|---------|-----------|-----------|-----------------------------------------------------------------------------------------|-----------------------------------------------------------------------------------------------------------|
| <b>Myristic acid (TMS)</b>           | 12.48 | 75+117+129+13<br>2+285 | 912     | 544-63-8  | HMDB00806 | FA biosynthesis                                                                         | NF                                                                                                        |
| <b>Palmitic acid (TMS)</b>           | 13.78 | 75+117+129+31<br>3     | 949/Std | 57-10-3   | HMDB00220 | FA and Glycerolipid metabolism; Bile acid biosynthesis                                  | <i>Ex vivo</i> tissues: ↓ (5)                                                                             |
| <b>Palmitoleic acid (TMS)</b>        | 13.65 | 75+117+129+31<br>1     | 918     | 373-49-9  | HMDB03229 | NA                                                                                      | NF                                                                                                        |
| <b>Pentadecanoic acid (TMS)</b>      | 13.14 | 117+299                | 838     | 1002-84-2 | HMDB00826 | NA                                                                                      | NF                                                                                                        |
| <b>Stearic acid (TMS)</b>            | 15.16 | 75+117                 | 948/Std | 57-11-4   | HMDB00827 | Biosynthesis of unsaturated fatty acids                                                 | NF                                                                                                        |
| <b>Monosaccharide</b>                |       |                        |         |           |           |                                                                                         |                                                                                                           |
| <b>Dihydroxyacetone (2TMS)</b>       | 7.24  | 103+189                | 801     | 96-26-4   | HMDB01882 | Inositol phosphate metabolism                                                           | <i>Biofluids</i> : ↓ (12)                                                                                 |
| <b>Organic acids and derivatives</b> |       |                        |         |           |           |                                                                                         |                                                                                                           |
| <b>Benzoic acid (TMS)</b>            | 7.53  | 105+137+179            | 809/Std | 65-85-0   | HMDB01870 | NA                                                                                      | NF                                                                                                        |
| <b>Glycolic acid (2TMS)</b>          | 5.61  | 75                     | 851     | 79-14-1   | HMDB00115 | NA                                                                                      | NF                                                                                                        |
| <b>Lactic acid (2TMS)</b>            | 5.45  | 117+191                | 949/Std | 79-33-4   | HMDB00190 | Glycolysis/Gluconeogenesis; Pyruvate metabolism                                         | <i>In vitro</i> : ↑ (2, 6)<br><i>Ex vivo</i> tissues: ↑ (3)<br><i>Biofluids</i> : ↑ (7, 12, 13),<br>↓ (4) |
| <b>Pyruvic acid (2TMS)</b>           | 5.77  | 148+217                | 892/Std | 127-17-3  | HMDB00243 | Amino acid metabolism; Glycolysis/Gluconeogenesis; Pentose Phosphate Pathway; TCA cycle | <i>In vitro</i> : ↓ (2, 6)<br><i>Biofluids</i> : ↑ (14)                                                   |
| <b>Succinic acid (2TMS)</b>          | 8.14  | 75                     | 871/Std | 110-15-6  | HMDB00254 | Amino acid metabolism; Pyruvate metabolism; TCA cycle                                   | <i>Biofluids</i> : ↑ (13, 14)                                                                             |

| <i>Organic compounds</i>      |       |         |         |          |           |                                                                 |                                                                 |
|-------------------------------|-------|---------|---------|----------|-----------|-----------------------------------------------------------------|-----------------------------------------------------------------|
| <b>Uracil (2TMS)</b>          | 8.37  | 99+241  | 841     | 66-22-8  | HMDB00300 | Pyrimidine metabolism                                           | <i>Ex vivo</i> tissues: ↑ (5)                                   |
| <b>Urea (2TMS)</b>            | 7.53  | 189     | 918/Std | 57-13-6  | HMDB00294 | Amino acids<br>metabolism, Purine and<br>Pyrimidine metabolisms | NF                                                              |
| <i>Sterol</i>                 |       |         |         |          |           |                                                                 |                                                                 |
| <b>Cholesterol (TMS)</b>      | 23.01 | 75+129  | 925/Std | 57-88-5  | HMDB00067 | Steroid biosynthesis; Bile<br>acid biosynthesis                 | NF                                                              |
| <i>Sugar alcohols</i>         |       |         |         |          |           |                                                                 |                                                                 |
| <b>Erythritol (4TMS)</b>      | 9.84  | 217     | 812     | 149-32-6 | HMDB02994 | NA                                                              | <i>In vitro</i> : ↑ (2)<br><i>Biofluids</i> : ↑ (12)            |
| <b>Myo-Inositol (6TMS)</b>    | 14.06 | 217+305 | 928/Std | 87-89-8  | HMDB00211 | Inositol phosphate<br>metabolism; Galactose<br>metabolism       | <i>In vitro</i> : ↓ (1); ↑ (2)<br><i>Ex vivo</i> tissues: ↑ (3) |
| <b>Scyllo-Inositol (6TMS)</b> | 13.39 | 217     | 813/Std | 488-59-5 | HMDB06088 | Inositol phosphate<br>metabolism                                | NF                                                              |
| <i>Unknown</i>                |       |         |         |          |           |                                                                 |                                                                 |
| <b>Unknown 1</b>              | 9.75  | 144+188 | -       | -        | -         | -                                                               | -                                                               |

CAS, Chemical Abstracts Service; CSF, Cerebrospinal Fluid; ER, Endoplasmic reticulum; FA, Fatty Acid; HMDB, Human Metabolome Database; ID, Identification; NA, not available; NF, not found; RI, Retention index; RT, Retention time; Std, Standard; TCA, tricarboxylic acid
